# Supplementary material for: Synergistic cancer immunotherapy combines MVA-CD40L induced innate and adaptive immunity with tumor targeting antibodies
Source: PubMed Central journal article supplement (PMC6834557; doi:10.1038/s41467-019-12998-6), 2019-11-06
Supplement: 41467_2019_12998_MOESM1_ESM.pdf [file 41467_2019_12998_MOESM1_ESM.pdf]

**Synergistic cancer immunotherapy combines MVA CD40L induced innate and adaptive immunity with tumor targeting antibodies**

Medina-Echeverez et al.

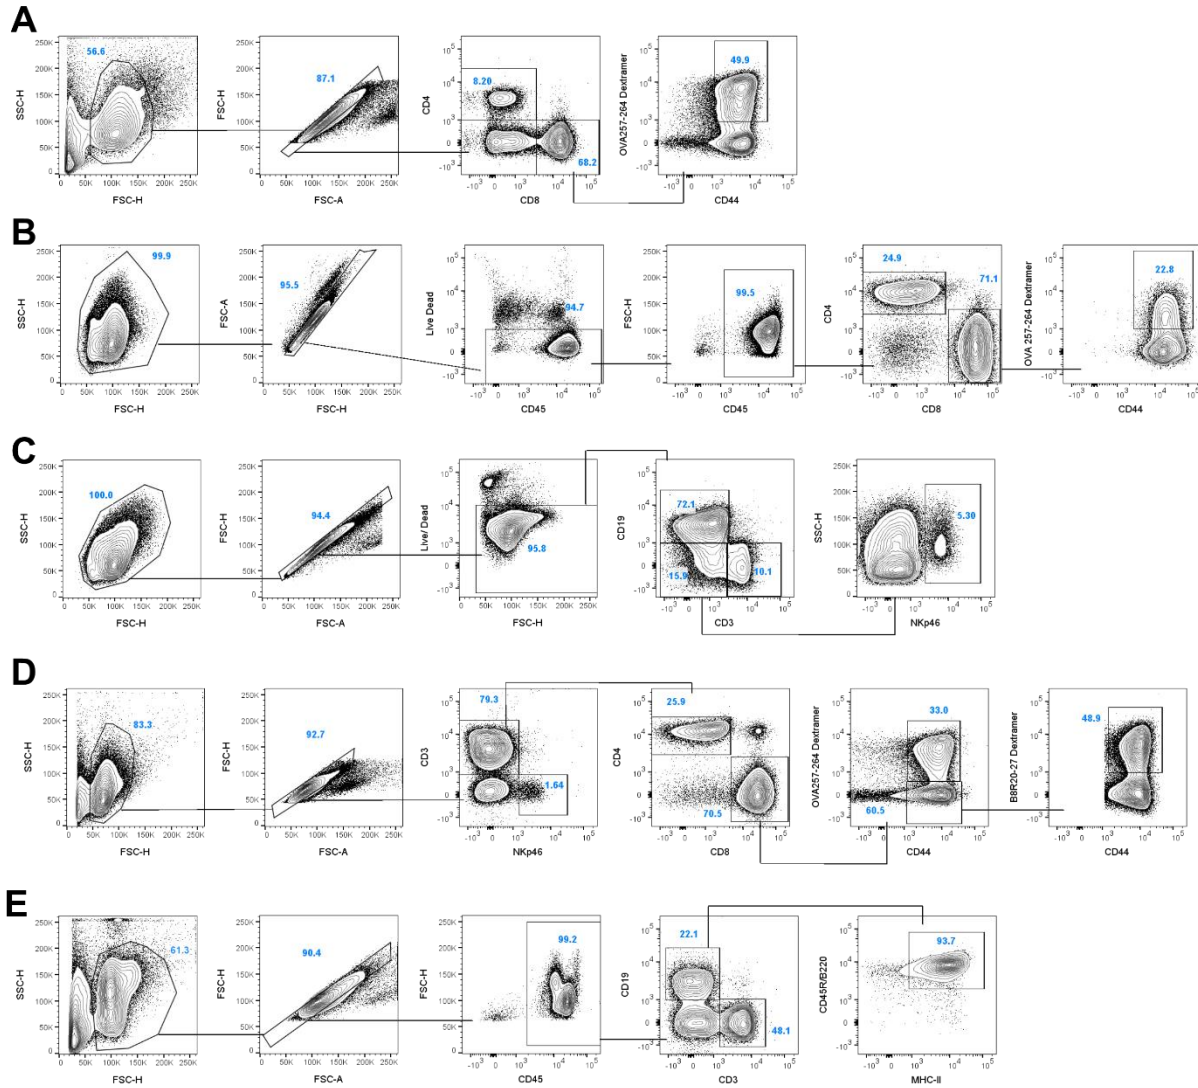

**Supplementary Figure 1. Gating strategies for flow cytometry analysis. (A)** Related to *Supplementary Figure 2*. Gating strategy on blood peripheral leukocytes to check percentage of OVA<sub>257-264</sub> Dextramer<sup>+</sup> CD8<sup>+</sup> T cells upon rMVA-CD40L immunization; **(B)** Related to *Figure 2*. Gating strategy on tumor cell suspensions seven days upon rMVA-CD40L immunization to check percentage of CD4<sup>+</sup> and OVA<sub>257-264</sub> Dextramer<sup>+</sup> CD8<sup>+</sup> T cell proliferation and exhaustion phenotype; **(C)** Related to *Figure 4* and *Supplementary Figure 5*. Representative gating strategy showed in splenic single cell suspensions to analyze NK cell frequencies and phenotype; **(D)** Related to *Supplementary Figure 7*. Gating strategy on blood peripheral leukocytes to check percentage of NK cells, OVA<sub>257-264</sub> Dextramer<sup>+</sup> CD8<sup>+</sup> T cells and B8R<sub>20-27</sub> Dextramer<sup>+</sup> CD8<sup>+</sup> T cells upon rMVA-CD40L immunization; **(E)** Related to *Supplementary Figure 8*. Gating strategy on blood peripheral leukocytes to check percentage of B cells upon rMVA-CD40L immunization.

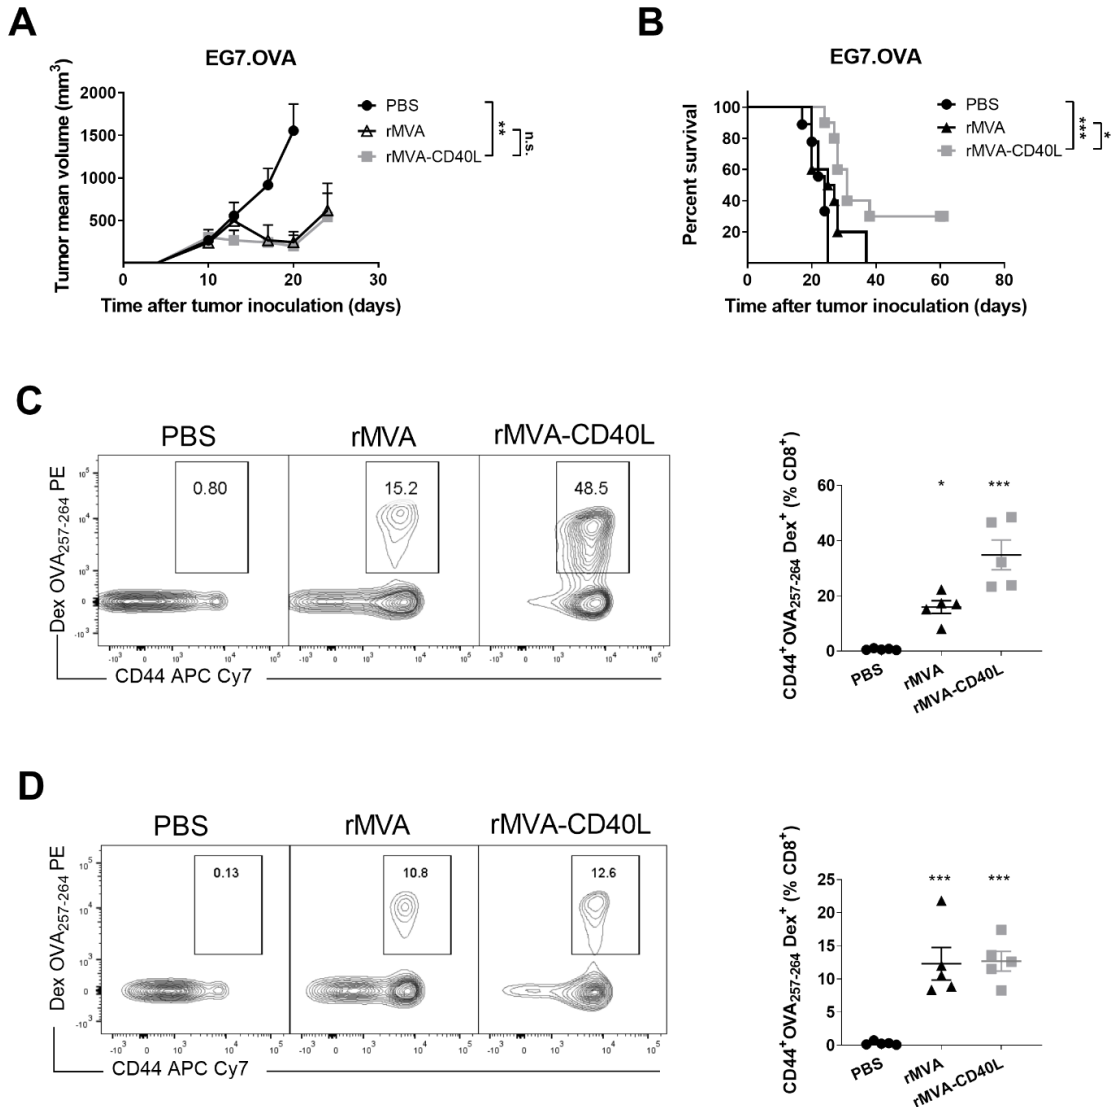

**Supplementary Figure 2. Therapeutic efficacy in EG7.OVA lymphoma and increased peripheral blood CD8<sup>+</sup> T cell responses in rMVA-CD40L immunized tumor-bearing mice.** Related to *Figure 1*. C57BL/6 mice received EG7.OVA as described at *Figure 1A*. **(A)** Tumor size follow-up (n=5 mice/group) and **(B)** overall survival (n= 10 mice/group) of mice injected either with PBS, MVA-OVA (referred to as rMVA) or MVA-OVA-CD40L (referred to as rMVA-CD40L); **(C)** Representative dot plots and frequency of peripheral blood CD44<sup>+</sup> Tet OVA<sub>257-264</sub><sup>+</sup> CD8<sup>+</sup> T cells 7 days after PBS, rMVA or rMVA-CD40L immunization to B16.OVA tumor-bearing mice (n= 5 mice/group). Data are representative of at least 2 independent experiments. **(D)** Representative dot plots and frequency of peripheral blood CD44<sup>+</sup> Dex OVA<sub>257-264</sub><sup>+</sup> CD8<sup>+</sup> T cells 7 days after PBS, rMVA or rMVA-CD40L immunization of EG7.OVA tumor-bearing mice (n= 5 mice/group). Data are representative of at least two independent experiments. Data expressed as Mean ± SEM. One-way ANOVA comparing MVA immunization vs PBS. \**p* < 0.05, \*\*\**p* < 0.005.

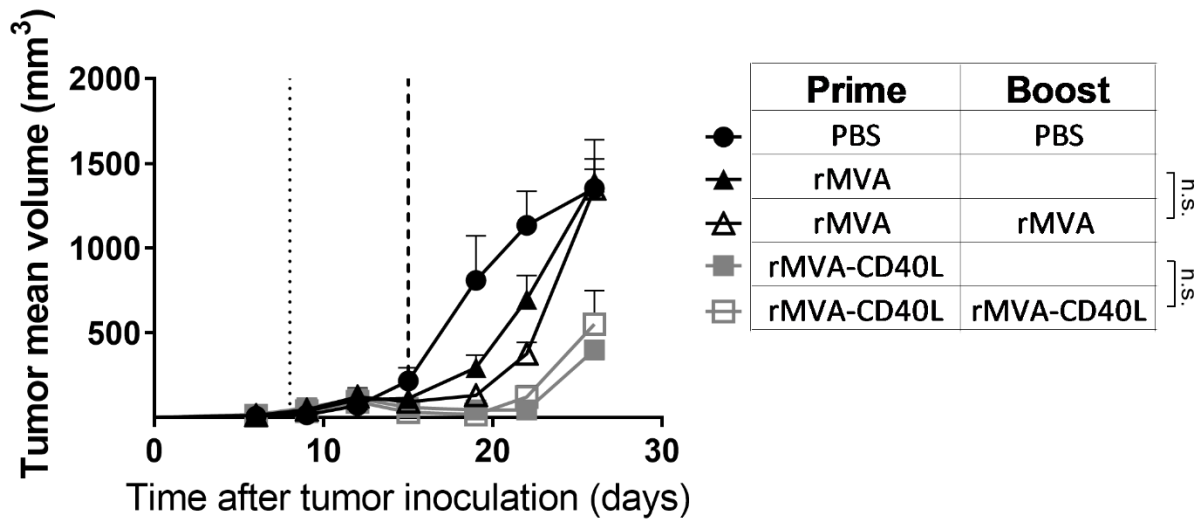

**Supplementary Figure 3. Repeated intravenous administration of rMVA vectors did not increase therapeutic efficacy.** Briefly, C57BL/6 mice received B16.OVA cells subcutaneously in the flank. Seven days later, when tumors were above 50 mm<sup>3</sup>, mice were grouped (n=5 mice/group) and immunized intravenously either with PBS or with 5x10<sup>7</sup> TCID<sub>50</sub> of the mentioned rMVA viruses in the table (black dotted line). Seven days after prime immunization, tumor-bearing mice received a boost immunization with 5x10<sup>7</sup> TCID<sub>50</sub> of the mentioned rMVA viruses in the table when indicated (black dashed line). Tumor growth was measured at regular intervals. Data expressed as Mean ± SEM. One-way ANOVA comparing MVA immunization vs PBS. \**p* < 0.05, \*\*\**p* < 0.005.

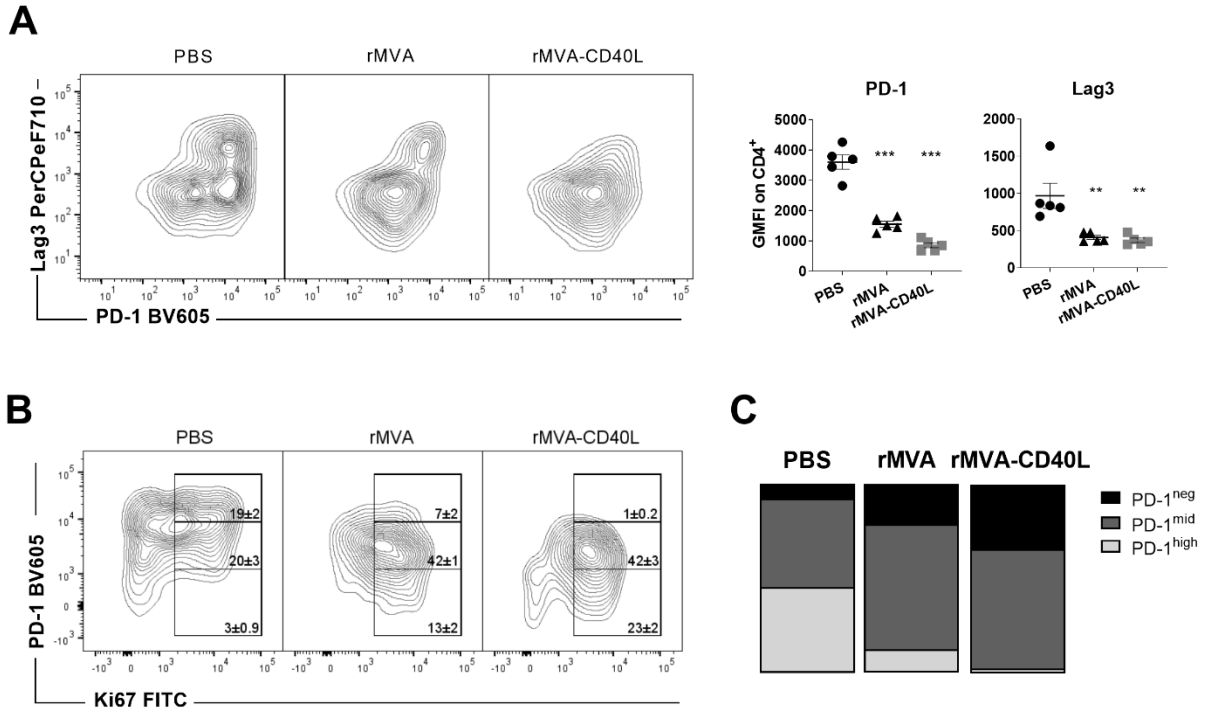

**Supplementary Figure 4. Tumor-infiltrating CD4 T cells present a less exhausted and proliferating phenotype upon treatment.** B16.OVA tumor bearers were immunized when tumors reached at least 50 mm<sup>3</sup> in volume. Seven days later, mice were sacrificed for further analysis (n= 5 mice/group). **(A)** Representative dot plots of PD-1 and Lag3 co-expression in tumor-infiltrating CD4<sup>+</sup> T cells; **(B)** GMFI of PD-1 and Lag3 on tumor-infiltrating CD4<sup>+</sup> T cells showing Mean ± SEM, representative of at least two independent experiments; **(C)** Representative dot plot of Ki67 and PD-1 expression on tumor-infiltrating CD4<sup>+</sup> T cells showing Mean ± SEM, representative of at least two independent experiments. B, One-way ANOVA comparing treatment groups vs PBS. \*,  $p < 0.05$ ; \*\*,  $p < 0.01$ ; \*\*\*,  $p < 0.005$ .

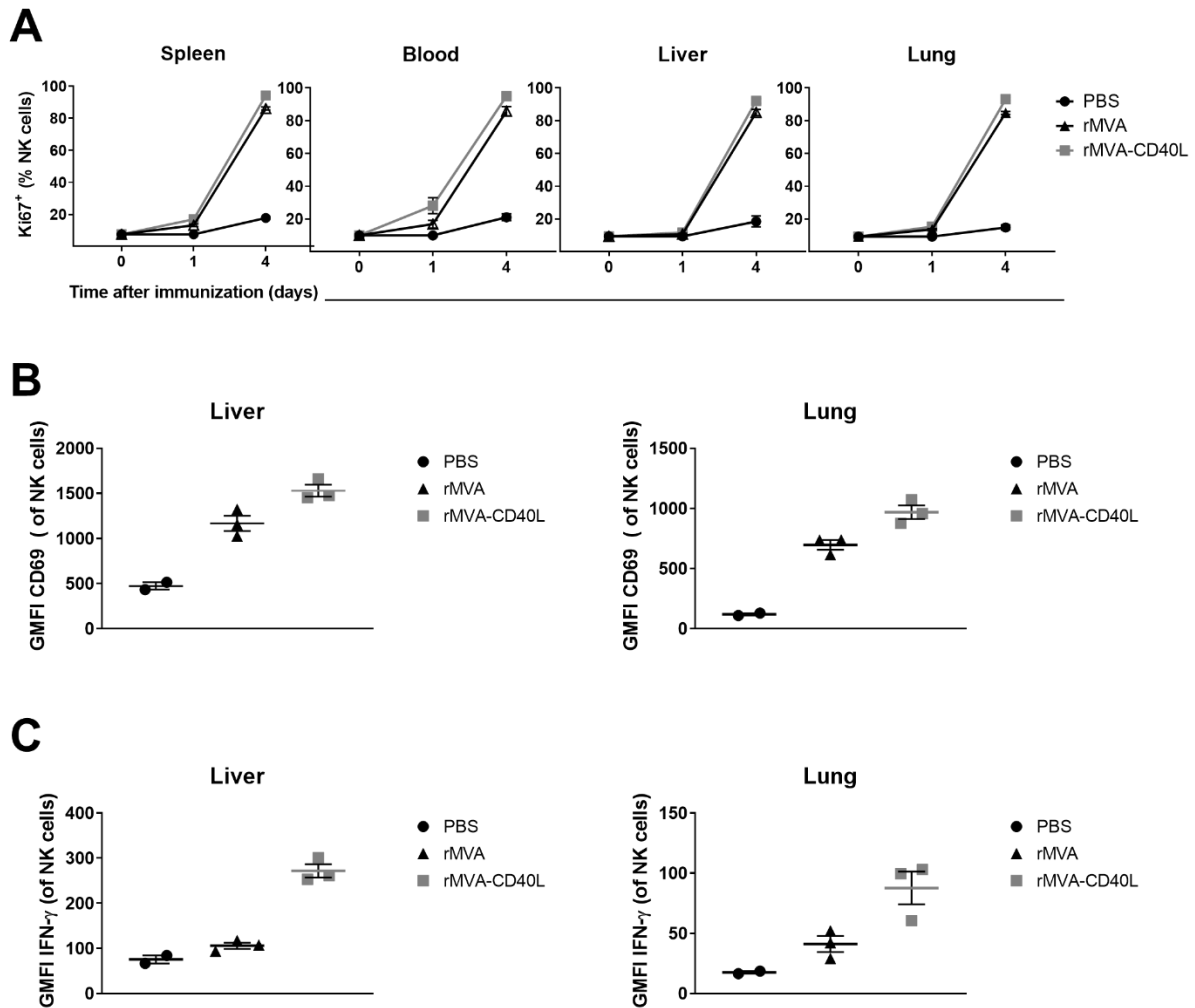

**Supplementary Figure 5. Intravenous immunization with rMVA CD40L enhances NK cell proliferation and activation in liver and lung.** (A) Systemic proliferation of NK cells upon intravenous rMVA immunization. C57BL/6 mice received PBS (n=2 mice) or were immunized i.v. with  $5 \times 10^7$  TCID<sub>50</sub> of either rMVA or rMVA-CD40L (n= 3 mice/group). Mice were sacrificed at days 1 and 4 after immunization and the frequency of Ki67-positive NK cells (defined as CD3<sup>-</sup> NKp46<sup>+</sup> cells) in spleen, blood, liver and lung was assessed. Data are expressed as Mean  $\pm$  SEM, representative of two independent experiments; (B, C) rMVA or rMVA-CD40L induction of NK cell activation. C57BL/6 mice received PBS (n=2 mice) or were immunized i.v. with  $5 \times 10^7$  TCID<sub>50</sub> of either rMVA or rMVA-CD40L (n= 3 mice/group). Mice were sacrificed at day 1 after immunization and the expression of CD69 (B) and IFN- $\gamma$  (C) on liver and lung-infiltrating NK cells was analyzed by flow cytometry. Data are expressed as Mean  $\pm$  SEM, representative of two independent experiments.

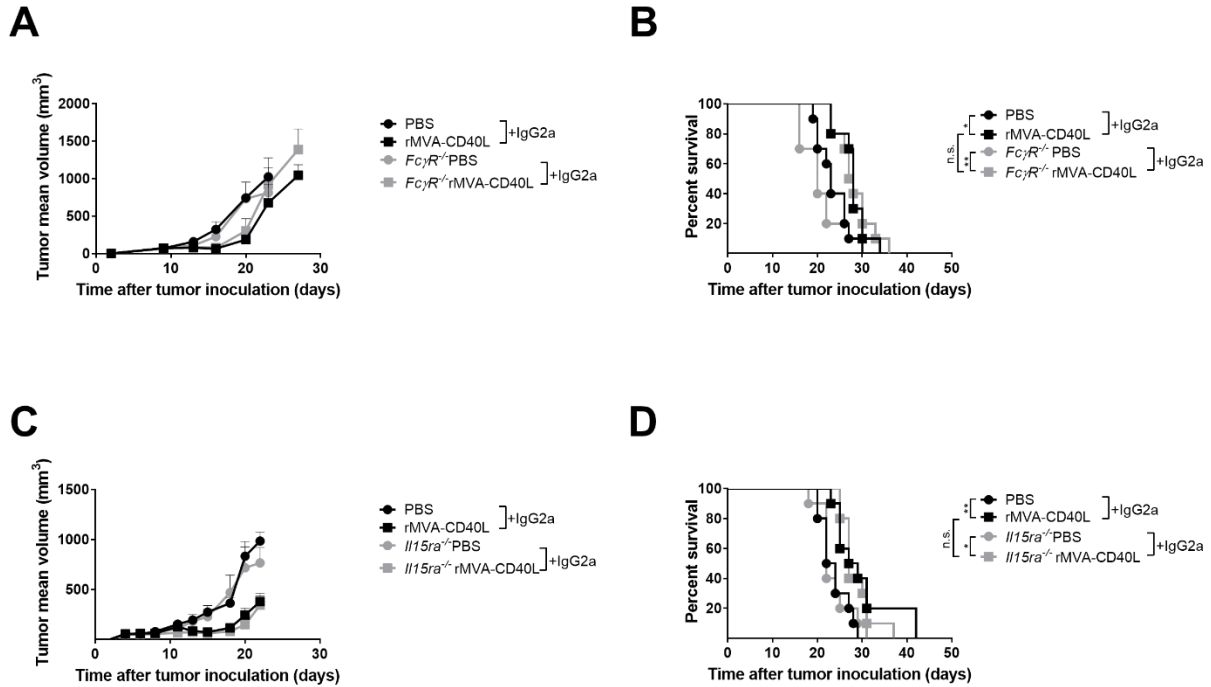

**Supplementary Figure 6. rMVA-CD40L enhances tumor growth control both in *FcγR*<sup>-/-</sup> and *IL15ra*<sup>-/-</sup> tumor-bearing mice.** (A, B) Performed along with Figures 6A and 6B. B16.OVA tumor-bearing wild type and *FcγR*<sup>-/-</sup> mice were grouped according to tumor size. Tumor-bearing mice either received PBS or were immunized with  $5 \times 10^7$  TCID<sub>50</sub> of rMVA-CD40L (Day 0). Mice received 200 μg of IgG2a antibody i.p. at days -2, 2, 6 and 10; (A) Tumor size follow-up (n= 5 mice/group) and (B) overall survival (n=10 mice/group). (C, D) Performed along with Figures 6C and 6D. B16.OVA tumor-bearing wild type and *IL15ra*<sup>-/-</sup> mice were grouped according to tumor size. Tumor bearing littermates either received PBS or were immunized with  $5 \times 10^7$  TCID<sub>50</sub> of rMVA-CD40L (Day 0). Mice received 200 μg of IgG2a antibody i.p. at days -2, 2, 6 and 10; (C) Tumor size follow-up (n= 5 mice/group) and (D) overall survival (n=10 mice/group). B and D represent overall survival of two merged independent experiments. Data in A and C are expressed as Mean ± SEM. One-way ANOVA was performed on figures A and C. Log rank test on mouse survival was performed for figures B and D. \*,  $p < 0.05$ ; \*\*,  $p < 0.01$ ; n.s. non-significant.

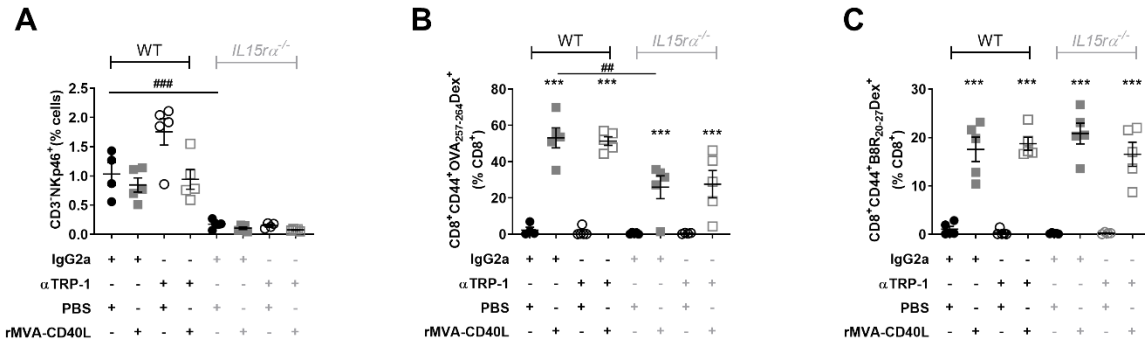

**Supplementary Figure 7. rMVA-CD40L expands antigen-specific CD8<sup>+</sup>T cells in the absence of IL15R $\alpha$ .**

WT and *IL15ra*<sup>-/-</sup> B16.OVA tumor bearing mice (n=5 mice/group) were treated as described in Figures 5 and 6. Seven days after immunization, mice were bled and peripheral blood analysis of immune cell subsets by flow cytometry was conducted. **(A)** Percentage of NK cells-gated as CD3<sup>+</sup>NKp46<sup>+</sup> in peripheral blood; **(B)** Frequency of OVA-specific CD8 T cells in peripheral blood; **(C)** Frequency of MVA-specific CD8 T cells in peripheral blood). Data in A, B and C are representative of two independent experiments. Data expressed as Mean  $\pm$  SEM. One-way ANOVA. \* represents the statistically significant differences among treatment groups from the same genotype, whereas # represents statistically significant differences among the same treatment group compared between wild type and *IL15Ra*<sup>-/-</sup> littermates. ###*p* < 0.01, ####*p* < 0.05, \*\*\**p* < 0.005.



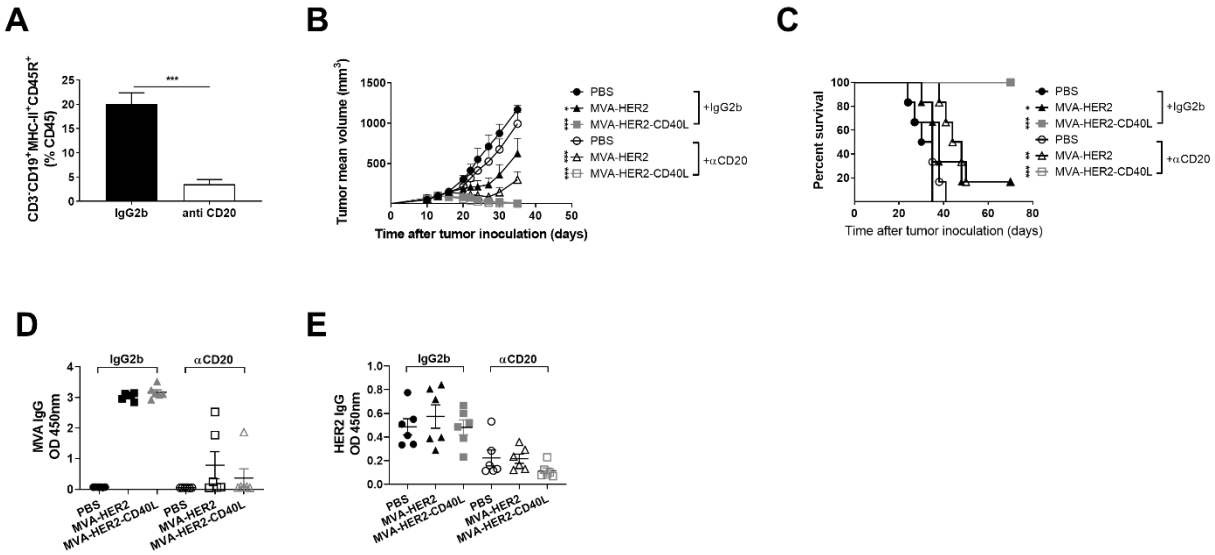

**Supplementary Figure 8. B cells and B cell-mediated antibodies are dispensable for rMVA-CD40L antitumor effect.** Balb/c mice received  $5 \times 10^5$  CT26.HER2 cells subcutaneously. 13 days later, mice were grouped ( $n=6$  mice/group) and IV injected either with PBS,  $5 \times 10^7$  TCID<sub>50</sub> MVA-HER2 or  $5 \times 10^7$  TCID<sub>50</sub> MVA-HER2-CD40L. Mice received 250 $\mu$ g anti-CD20 Ab (clone SA271G2) or IgG2b IV 4 days prior and 9 days after tumor cell inoculation. Blood for the detection of specific antibodies was withdrawn 7 days before and 27 days after CT26.HER2 tumor cell inoculation. Tumor growth was measured at regular intervals. **(A)** Percentage of CD3<sup>+</sup> CD19<sup>+</sup> MHC-II<sup>+</sup> CD45R<sup>+</sup> cells of CD45<sup>+</sup> cells in blood 8 days after CT26.HER2 cell inoculation; **(B)** Mean tumor volume; **(C)** Kaplan Meier plot showing survival of mice. ELISA on serum samples taken at day 27 after tumor inoculation against MVA IgG **(D)** or HER2 IgG **(E)**. This experiment has been partially shown in Figures 1H and 1I. Data expressed as Mean  $\pm$  SEM. B was analyzed using One-way ANOVA comparing MVA immunization vs PBS; C was analyzed using Log-rank test. \* $p < 0.05$ , \*\*\* $p < 0.005$ .
